# Supplementary material for: Coronapandemie vergrootte ongelijke toegang tot zorg voor chronisch zieken met beperkte gezondheidsvaardigheden
Source: Springer Nature journal article supplement (doi:10.1007/s12508-023-00420-y), 2023-11-13
Supplement: MOESM1 [file 26300188]

---

## DEEL D ZORG TIJDENS DE CORONAPANDEMIE

---

**1. In welke mate bent u het eens of oneens met de onderstaande stelling?**

Ik heb het gevoel dat ik op dit moment de zorg kan krijgen die ik nodig heb.

| Zeer eens                | Eens                     | Niet eens,<br>niet oneens | Oneens                   | Zeer oneens              | Weet ik niet             |
|--------------------------|--------------------------|---------------------------|--------------------------|--------------------------|--------------------------|
| <input type="checkbox"/> | <input type="checkbox"/> | <input type="checkbox"/>  | <input type="checkbox"/> | <input type="checkbox"/> | <input type="checkbox"/> |

---

**2. Heeft de coronacrisis het afgelopen jaar invloed gehad op de *professionele* zorg en ondersteuning die u heeft gekregen voor uw chronische ziekte of beperking?**

*(Meerdere antwoorden mogelijk)*

- Nee → **ga door naar vraag 8**
  - Ja, één of meerdere afspraken zijn volledig afgezegd → **ga door naar vraag 4**
  - Ja, één of meerdere afspraken zijn uitgesteld → **ga door naar vraag 4**
  - Ja, één of meerdere afspraken hebben telefonisch plaatsgevonden → **ga door naar vraag 4**
  - Ja, één of meerdere afspraken hebben digitaal plaatsgevonden (via beeldbellen of via e-mail) → **ga door naar vraag 4**
  - Ja, ik heb er zelf voor gekozen om één of meerdere afspraken uit te stellen of af te zeggen
- 

**3. Waarom heeft u ervoor gekozen om één of meerdere afspraken uit te stellen of af te zeggen?**

*(Meerdere antwoorden mogelijk)*

- Ik was zelf besmet met het coronavirus, ik zat in quarantaine of in isolatie
- Ik was bang om zelf besmet te raken met het coronavirus
- Ik was bang om iemand anders te besmetten met het coronavirus
- Ik wilde de zorg niet extra belasten
- De afspraak kon alleen online en dat vond ik niet prettig
- Een andere reden die te maken had met corona (bijvoorbeeld ik wou niet met het openbaar vervoer reizen vanwege corona)
- Een andere reden die niet te maken had met corona (bijvoorbeeld geen tijd)

---

**4. Bij welke zorgverlener(s) ondervond u gevolgen voor uw zorg en ondersteuning?**

*(Meerdere antwoorden mogelijk)*

- Huisarts
- Praktijkondersteuner huisarts (POH)
- Medisch specialist
- Bedrijfsarts
- Gespecialiseerd verpleegkundige in het ziekenhuis
- Wijkverpleegkundige
- Thuiszorg
- Fysiotherapeut
- Psycholoog/psychiater
- Apotheek
- Andere zorgverlener, namelijk:

---

**5. Heeft u de zorg of behandeling die uitgesteld of afgezegd was nu wel ontvangen? We bedoelen de zorg die is uitgesteld of afgezegd door uw behandelaar of uzelf.**

- Ja, alles
- Ja, een deel
- Nee, en ik heb de zorg wel nodig
- Nee, maar ik heb de zorg nu niet meer nodig (bijvoorbeeld omdat de klacht vanzelf is overgegaan)
- Niet van toepassing, ik heb de zorg wel ontvangen, maar op een andere manier (namelijk digitaal of telefonisch)

---

**6. Wacht u op dit moment langer op een behandeling of opname dan normaal (bijvoorbeeld als gevolg van de coronapandemie)?**

- Nee
- Ja, ik wacht nu   weken
- Niet van toepassing, ik heb geen behandeling nodig

---

**7. In hoeverre heeft professionele zorg of ondersteuning die veranderd, verplaatst of stopgezet is gevolgen voor u? Bent u bijvoorbeeld minder mobiel of heeft u (toenemende) klachten?**

- In sterke mate gevolgen
- In redelijke mate gevolgen
- Nauwelijks gevolgen
- Geen gevolgen
- Niet van toepassing, mijn zorg is niet veranderd, verplaatst of stopgezet

**8. Heeft u het gevoel dat uw ziekte of beperking als minder belangrijk wordt gezien doordat (zorg voor) corona voorop staat?**

- In sterke mate
- Een beetje
- Nee
- Weet ik niet
